# Supplementary material
Source: Royal Society of Chemistry journal article supplement (doi:10.1039/d6py00309e)
Supplement: d6py00309e1.pdf [file d6py00309e1.pdf]

## Supporting Information

# Carboxylic acid $\alpha$ -end functionalized poly(2-oxazoline)s synthesized through benzylic CROP initiators

*Caroline T. Holick, Nora Engel, Nicole Fritz, Christine Weber, Ulrich S. Schubert\**

Caroline T. Holick, Nora Engel, Nicole Fritz, Christine Weber, Ulrich S. Schubert  
Laboratory of Organic and Macromolecular Chemistry (IOMC), Friedrich Schiller University  
Jena, Humboldtstrasse 10, 07743 Jena, Germany  
Email: [ulrich.schubert@uni-jena.de](mailto:ulrich.schubert@uni-jena.de)

Caroline T. Holick, Nora Engel, Nicole Fritz, Christine Weber, Ulrich S. Schubert  
Jena Center for Soft Matter (JCSM), Friedrich Schiller University Jena, Philosophenweg 7,  
07743 Jena, Germany

Ulrich S. Schubert  
Helmholtz Institute for Polymers in Energy Applications Jena (HIPOLE Jena), Lessingstraße  
12–14, 07743 Jena, Germany

Ulrich S. Schubert  
Helmholtz-Zentrum Berlin für Materialien und Energie GmbH (HZB), Hahn-Meitner-Platz 1,  
14109 Berlin, Germany

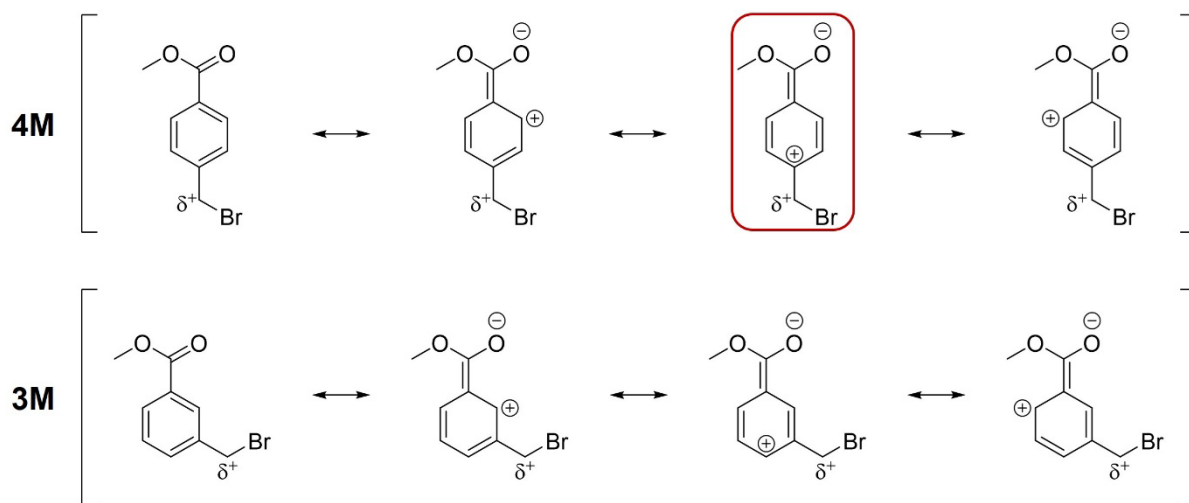

**Scheme S1:** Schematic representation of the resonance structures for methyl 4-(bromomethyl)benzoate (**4M**) and methyl 3-(bromomethyl)benzoate (**3M**).

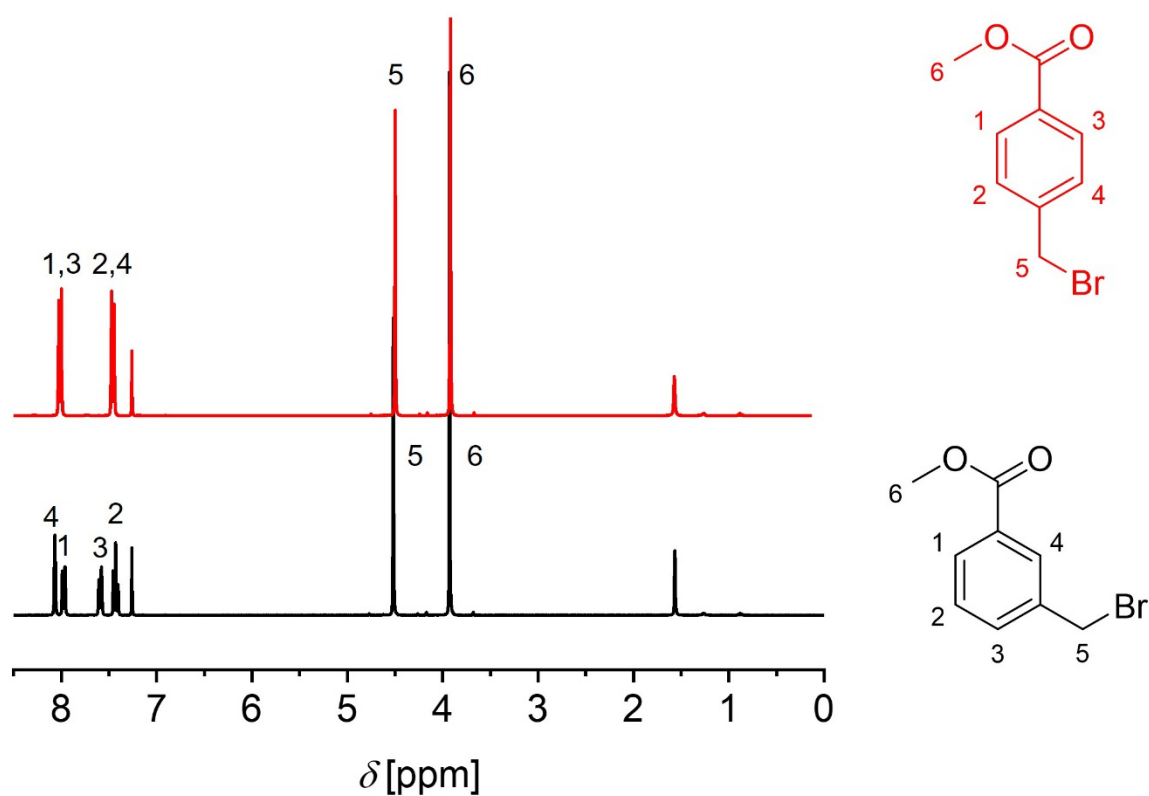

**Figure S1:**  $^1\text{H}$  NMR spectra of methyl-4-(bromomethyl)benzoate (**4M**, red) and methyl-3-(bromomethyl)benzoate (**3M**, black).

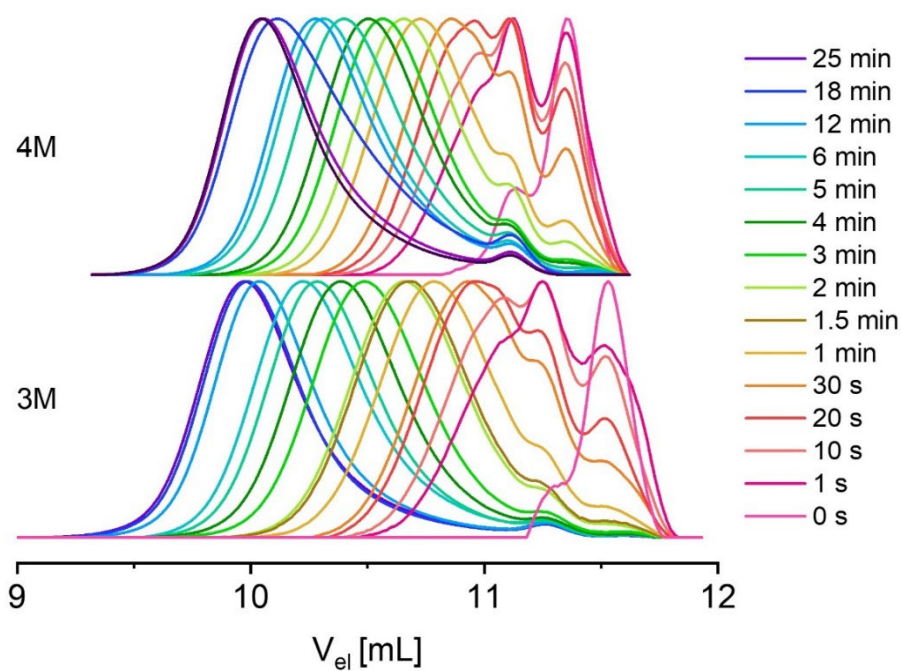

**Figure S2:** Overlay of the SEC elugrams (RID) taken during the CROP of EtOx initiated by 3M or 4M at 140 °C.

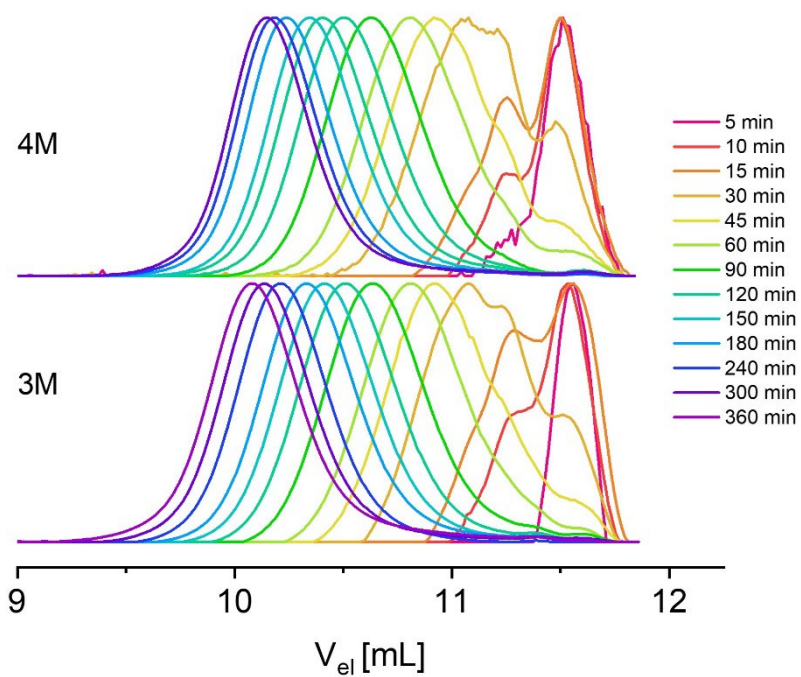

**Figure S3:** Overlay of the SEC elugrams (RID) taken during the CROP of EtOx initiated by 3M or 4M at 85 °C.

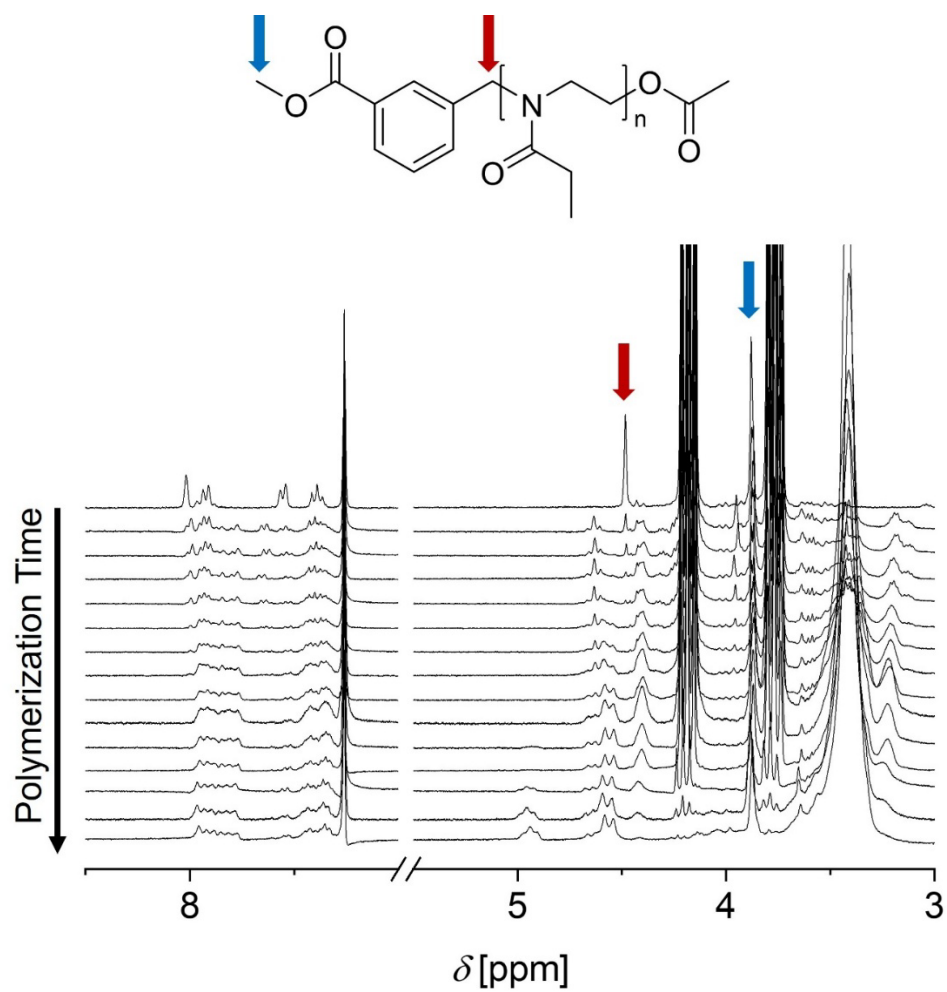

**Figure S4:** Overlay of <sup>1</sup>H NMR spectra taken during the CROP of EtOx initiated by **3M** at 140 °C. Arrows indicate the proton signals used to determine the initiation efficiency.

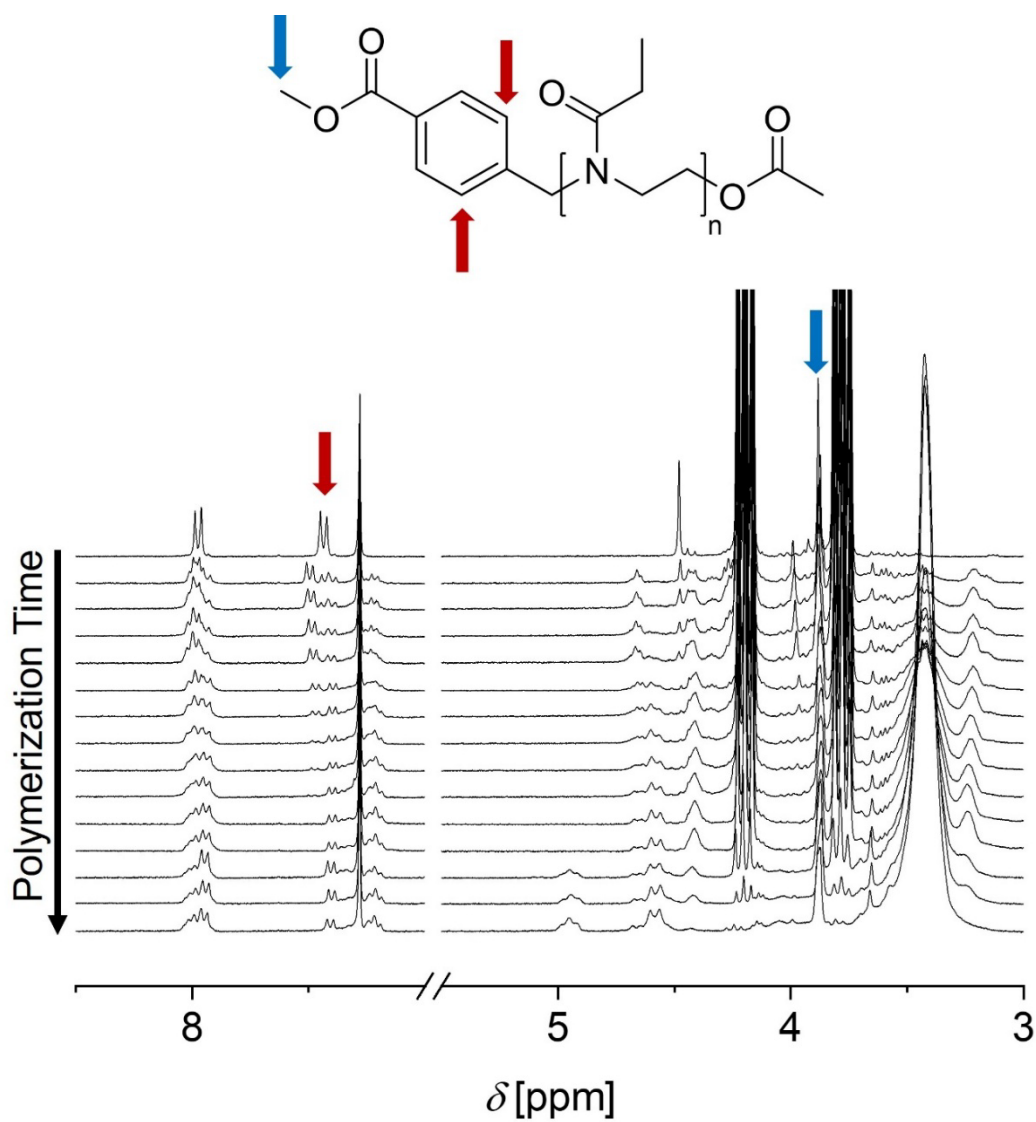

**Figure S5:** Overlay of <sup>1</sup>H NMR spectra during the CROP of EtOx initiated by **4M** at 140 °C. Arrows indicate the protons used to determine the initiation efficiency.

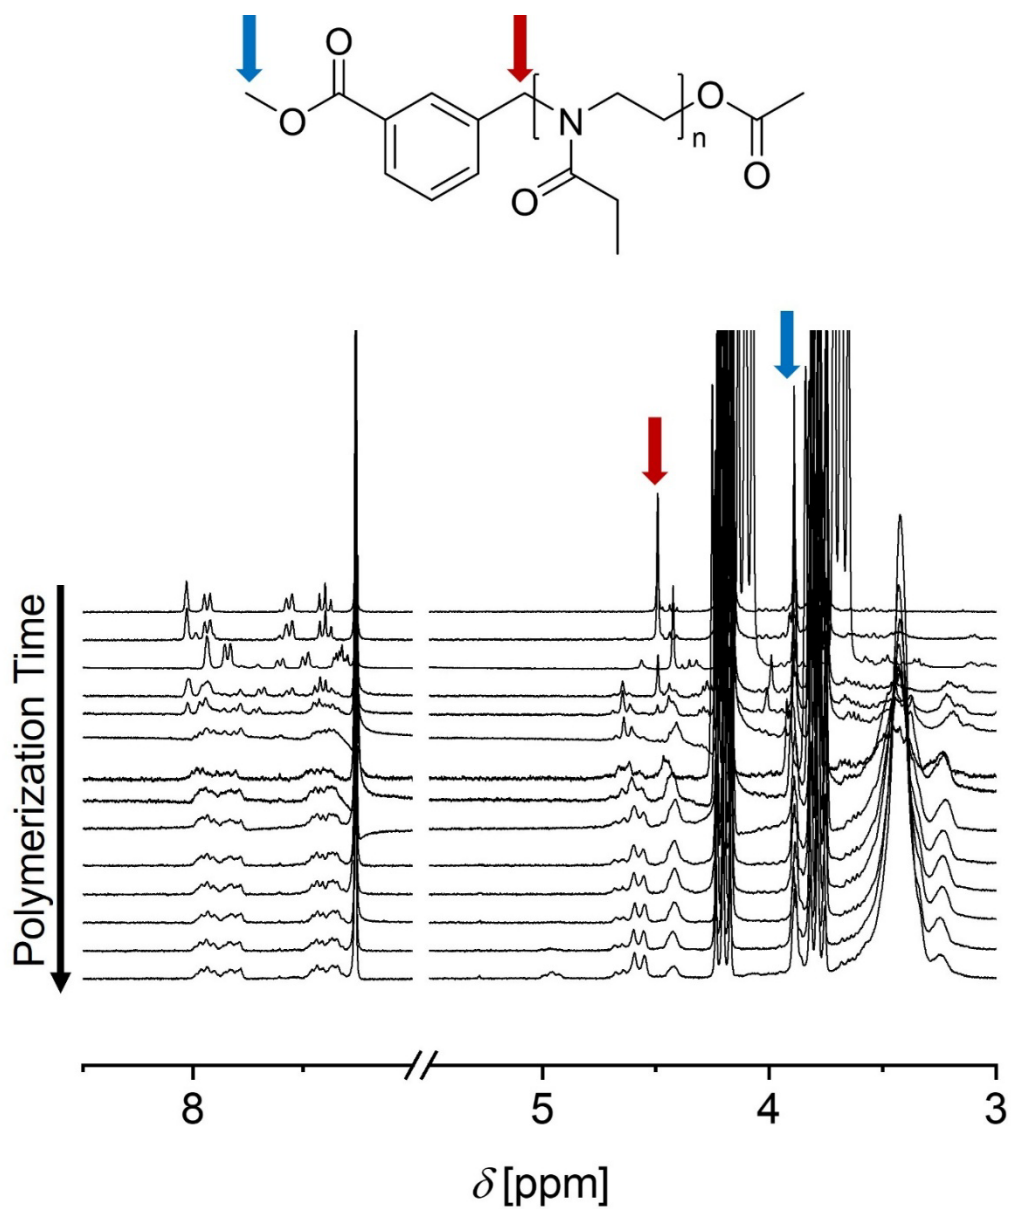

**Figure S6:** Overlay of  $^1\text{H}$  NMR spectra during the CROP of EtOx initiated by **3M** at 85 °C. Arrows indicate the protons used to determine the initiation efficiency.

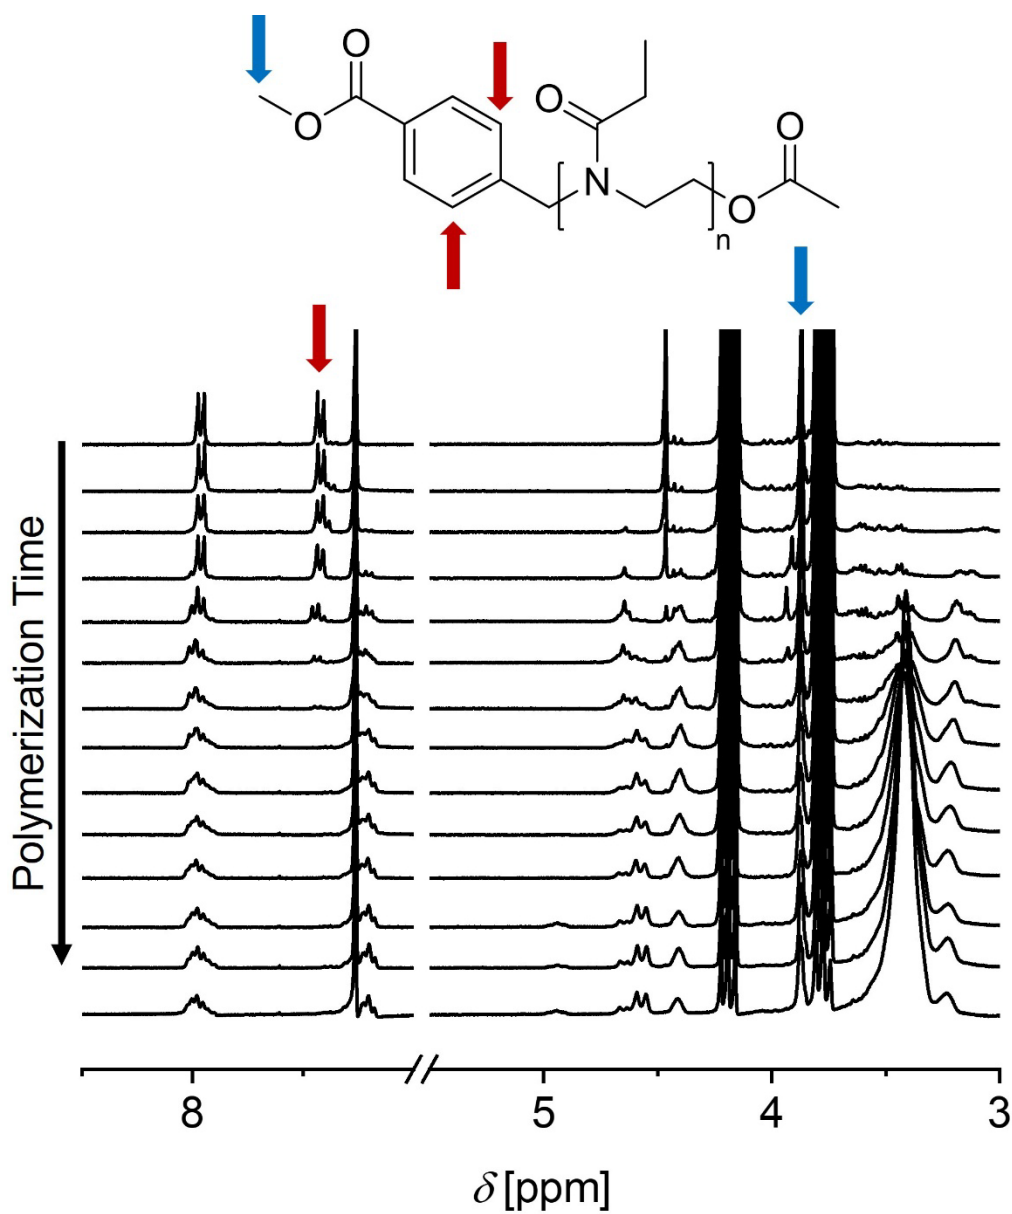

**Figure S7:** Overlay of <sup>1</sup>H NMR spectra during the CROP of EtOx initiated by **4M** at 85 °C. Arrows indicate the protons used to determine the initiation efficiency.

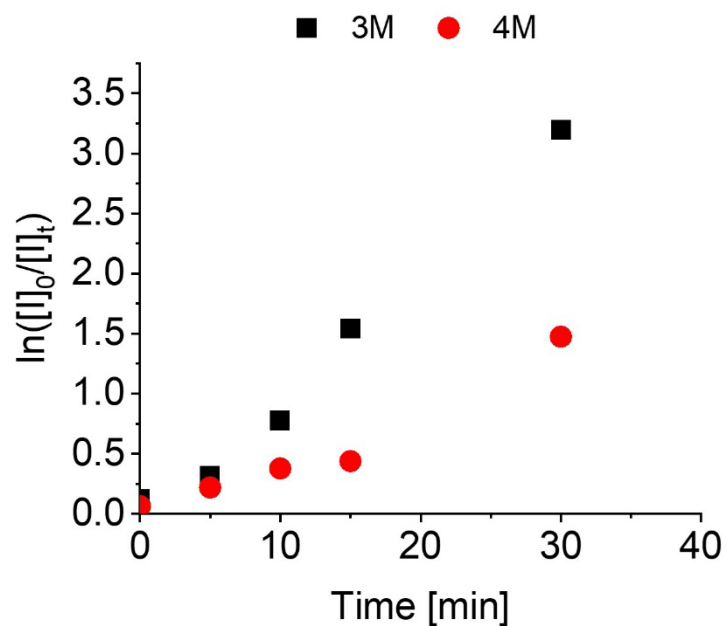

**Figure S8:** First order kinetic plot regarding initiator concentration during the CROP of EtOx initiated by **3M** or **3M** at 85 °C.  $[I]_0/[I]_t$  was estimated from the  $^1\text{H}$  NMR spectra.

### CROP

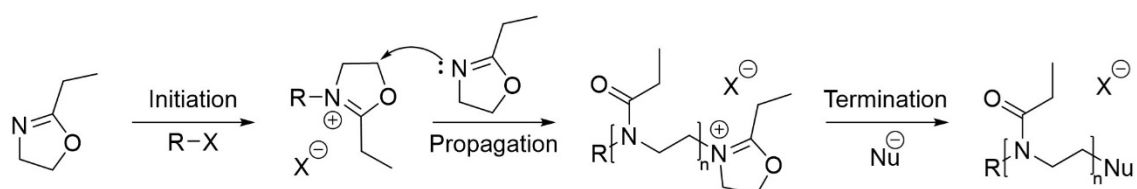

### Chain transfer

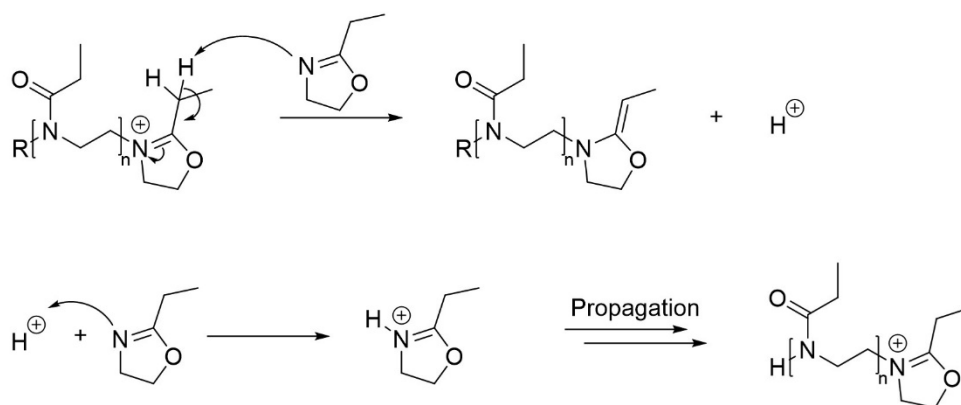

**Scheme S2:** Schematic representation of the cationic ring-opening polymerization and chain transfer reaction.

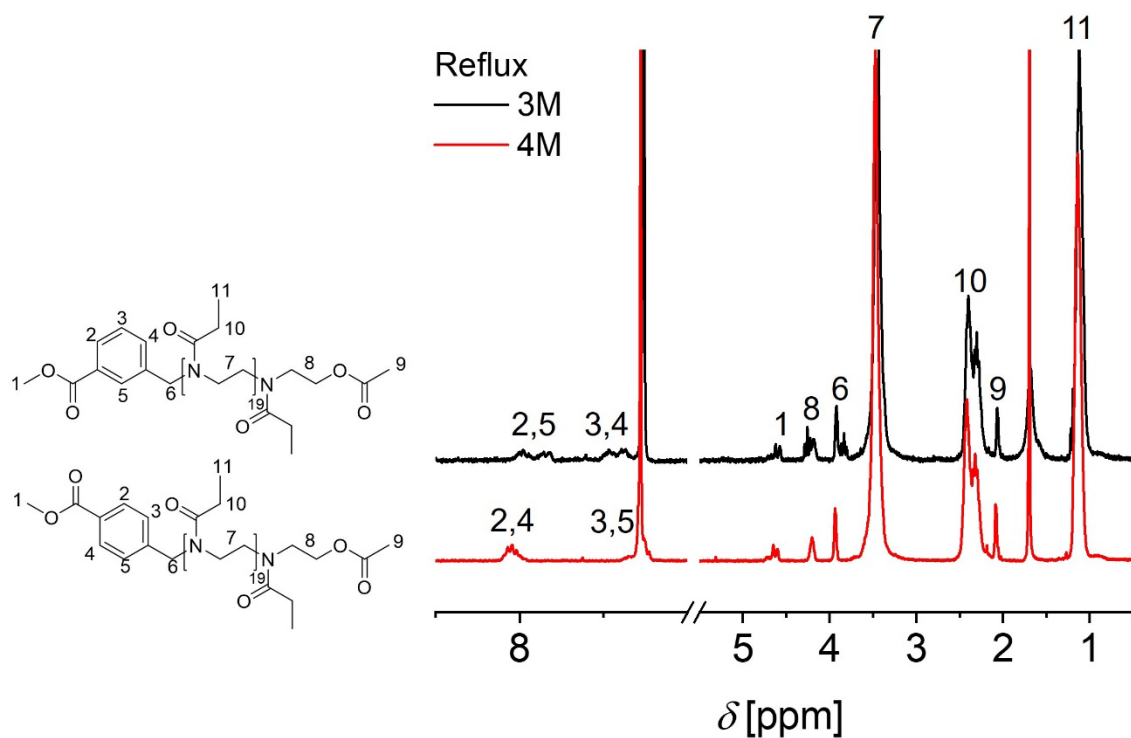

**Figure S9:**  $^1\text{H}$  NMR spectra (300 MHz,  $\text{CDCl}_3$ ) of **3M-EtO<sub>x</sub>20-OAc** and **4M-EtO<sub>x</sub>20-OAc** synthesized under reflux conditions (85 °C) including assignments of the peaks to the schematic representation of the structures.

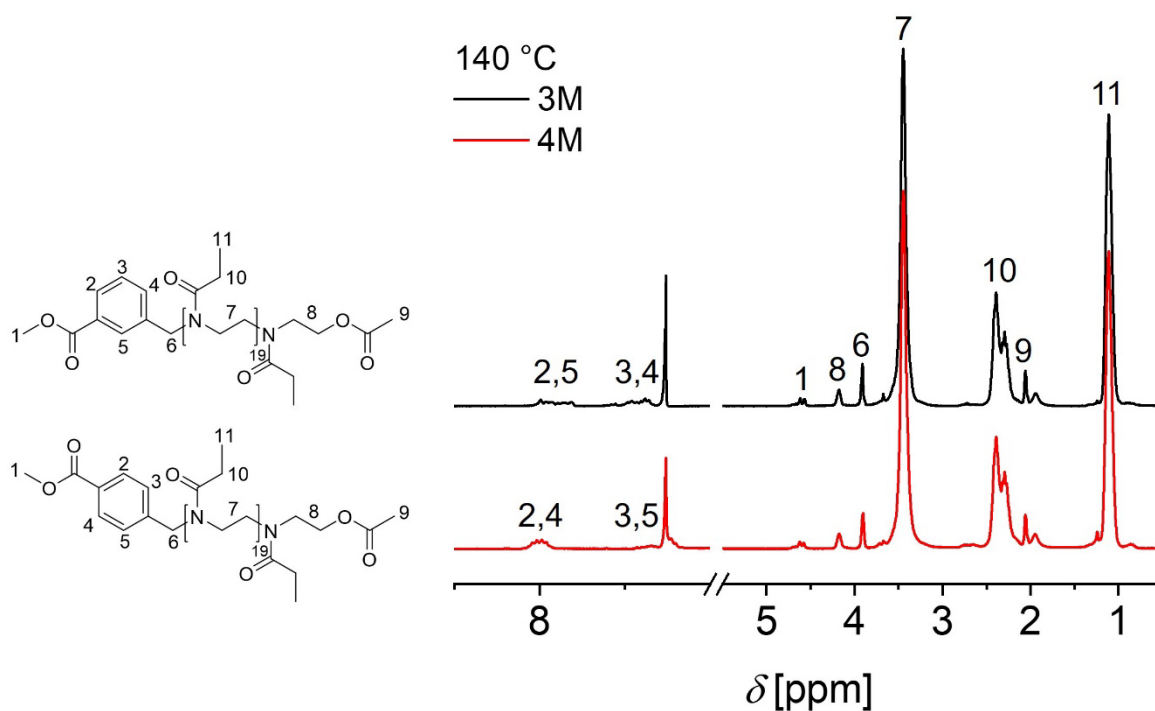

**Figure S10:**  $^1\text{H}$  NMR spectra (300 MHz,  $\text{CDCl}_3$ ) of **3M-EtO<sub>x</sub>20-OAc** and **4M-EtO<sub>x</sub>20-OAc** synthesized at 140 °C including assignments of the peaks to the schematic representation of the structures.

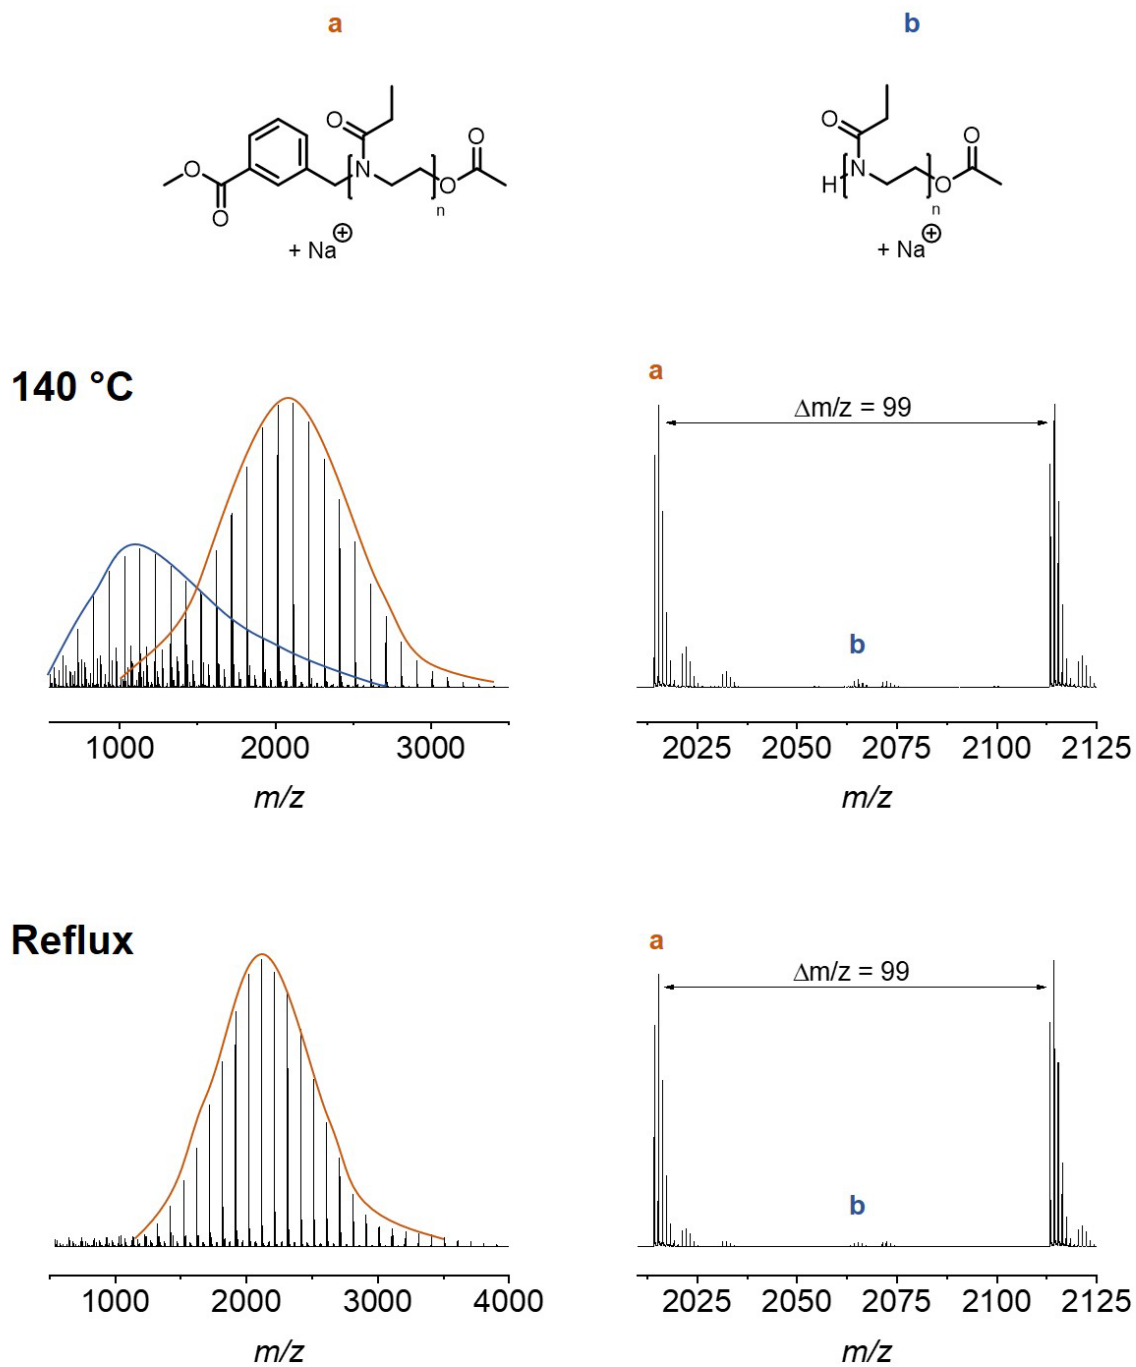

**Figure S11:** MALDI-TOF MS measurements of **3M-EtOx<sub>20</sub>OAc** synthesized under reflux conditions (85 °C) or at 140 °C. Left: Full spectra. Right: Zoom into the most abundant  $m/z$  region to display the EtOx repeating unit of  $\Delta m/z = 99$  and peak assignment.

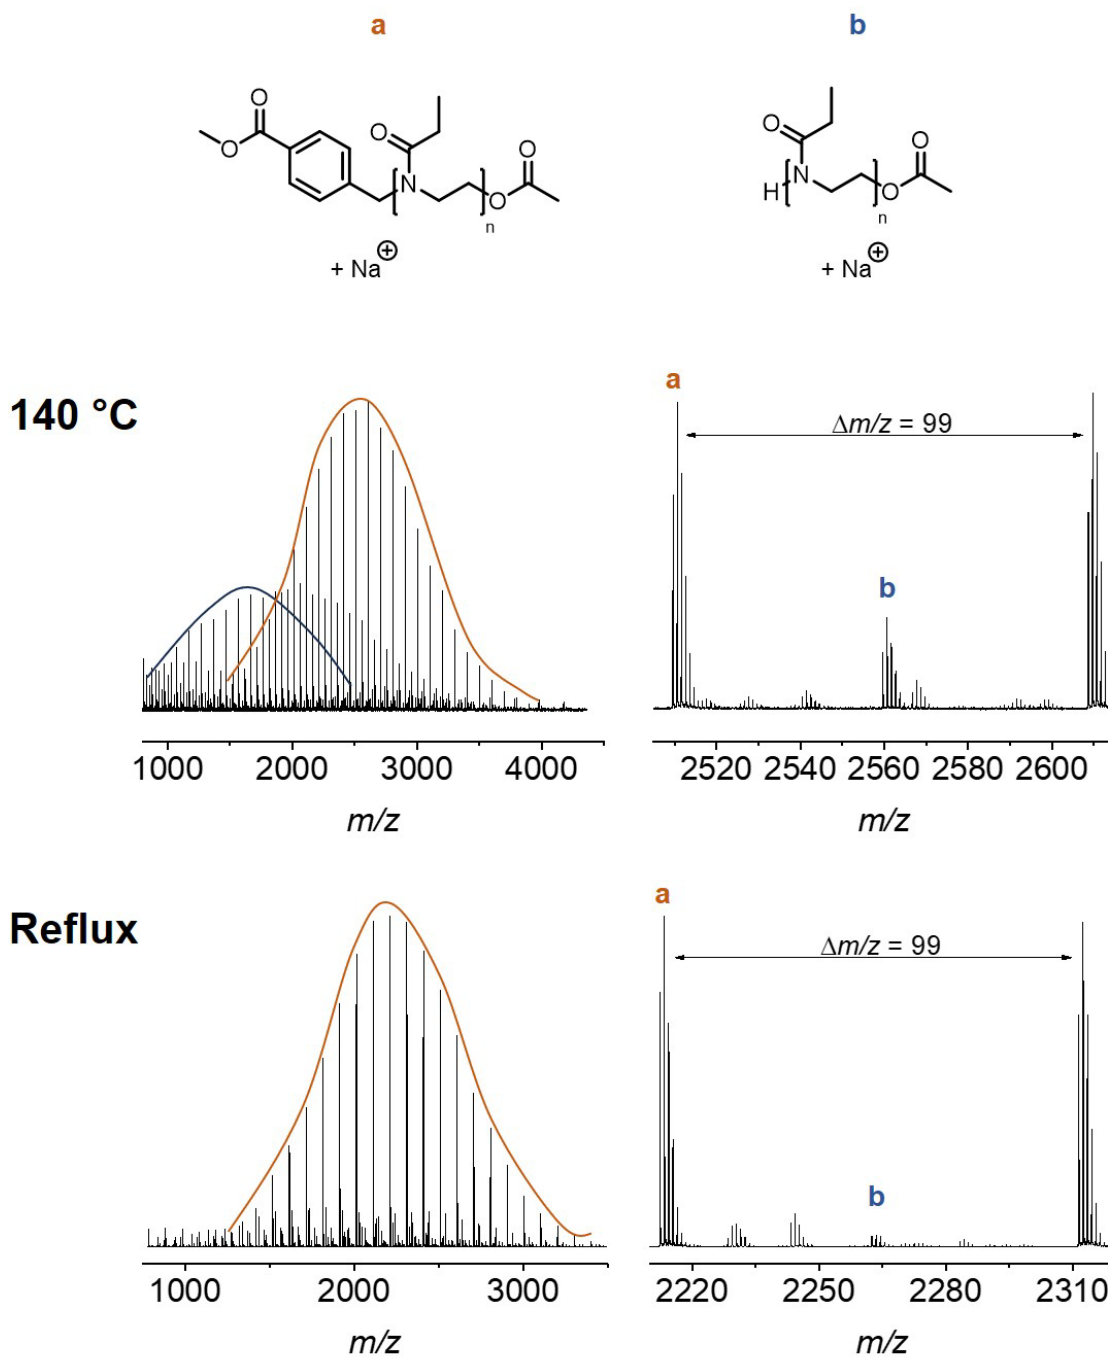

**Figure S12:** MALDI-TOF MS measurements of **4M-EtOx<sub>20</sub>OAc** synthesized under reflux conditions (85 °C) or at 140 °C. Left: Full spectra. Right: Zoom into the most abundant  $m/z$  region to display the EtOx repeating unit of  $\Delta m/z = 99$  and peak assignment.

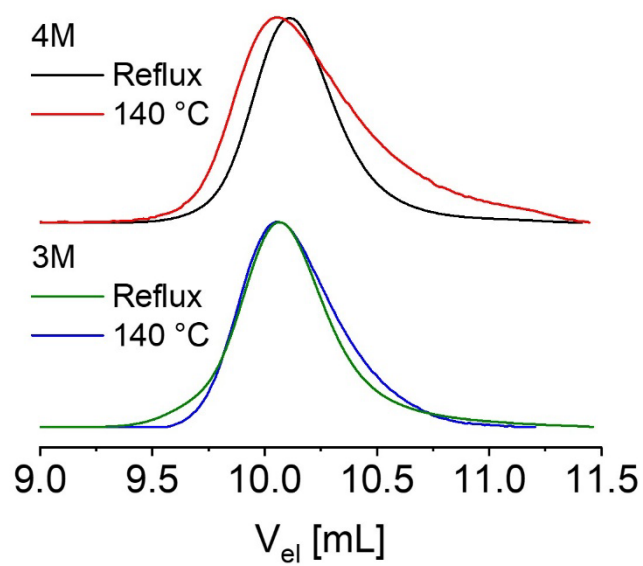

**Figure S13:** SEC elugrams (RI detection) of **3M-EtO<sub>x20</sub>-OAc** and **4M-EtO<sub>x20</sub>-OAc** synthesized at 140 °C or under reflux conditions (85 °C).

**A**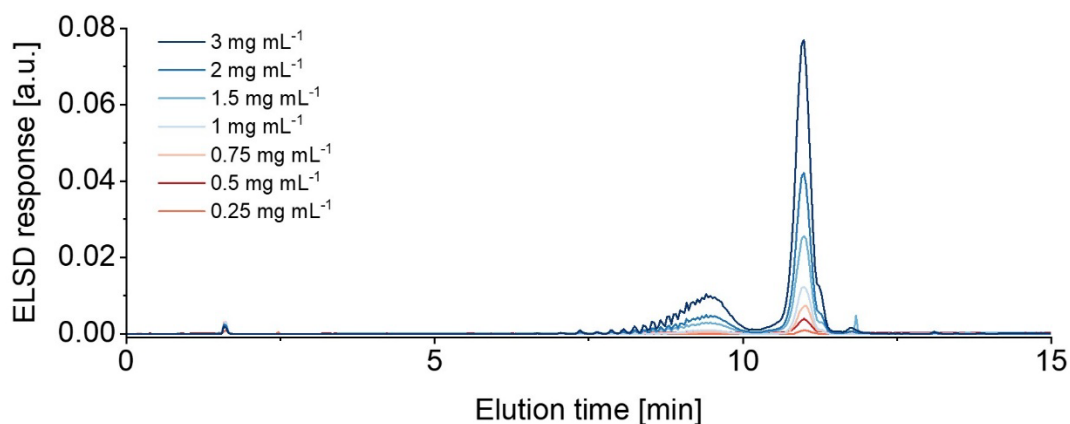**B**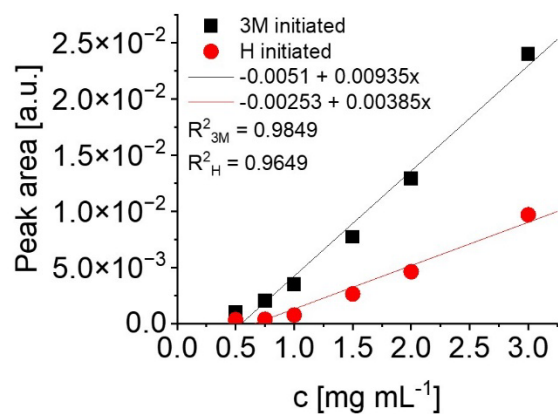**C**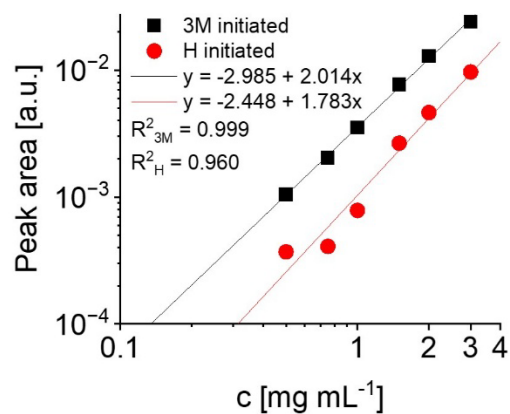

**Figure S14:** ELSD linearity test using a serial dilution of **4M-EtOx<sub>20</sub>-OAc**. **A:** Elugrams of all measured concentrations. **B** Plot of signal area for the signal at around 10.9 min (**4M** initiated) and 9.5 mL (H initiated) against polymer concentration. **C:** Double logarithmic plot of signal area for the signal at around 10.9 min (**4M** initiated) and 9.5 mL (H-initiated) against polymer concentration.

**Table S1:** Signal area percentages from the HPLC chromatograms of **4M-EtOx<sub>20</sub>-OAc** (synthesized at 140 °C) measured at varying concentrations.

| Concentration<br>[mg mL <sup>-1</sup> ] | Signal area <sub>4M initiated</sub><br>[%] | Signal area <sub>H initiated</sub><br>[%] |
|-----------------------------------------|--------------------------------------------|-------------------------------------------|
| 3.00                                    | 72                                         | 28                                        |
| 2.00                                    | 74                                         | 26                                        |
| 1.50                                    | 74                                         | 26                                        |
| 1.00                                    | 82                                         | 18                                        |
| 0.75                                    | 83                                         | 17                                        |
| 0.50                                    | 74                                         | 26                                        |
| 0.25                                    | n.d.                                       | n.d.                                      |

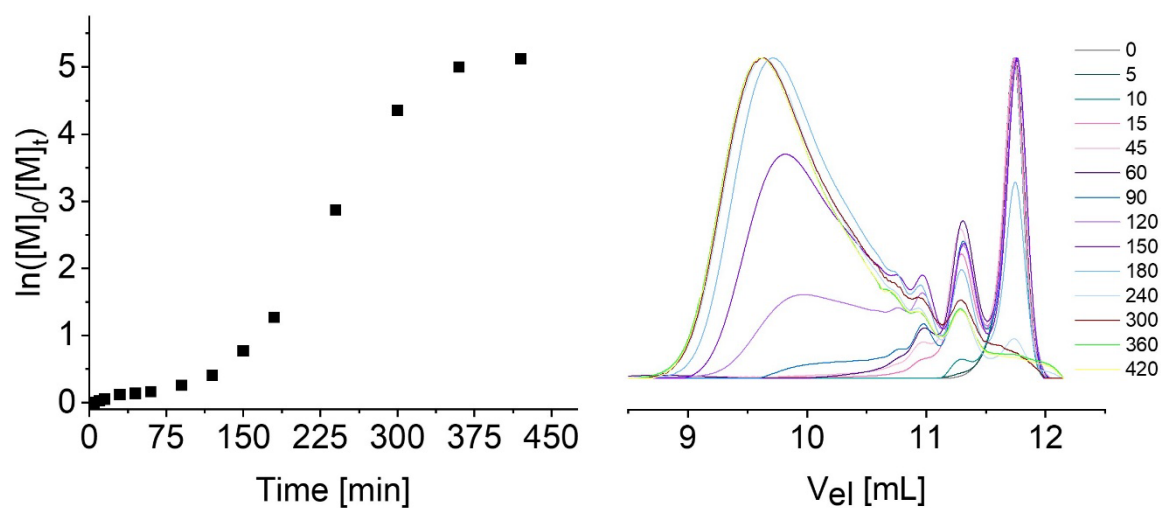

**Figure S15:** Kinetic investigation of the CROP of NonOx initiated by **3M**. ( $[M]_0/[I]_0 = 10$ ,  $[M]_0 = 2 \text{ mol L}^{-1}$  in chlorobenzene, 135 °C). **A:** First-order kinetic plot. Conversion was determined *via* GC. **B:** Overlay of SEC elugrams (RID, PS calibration).

$$[M]/[I] = 10$$

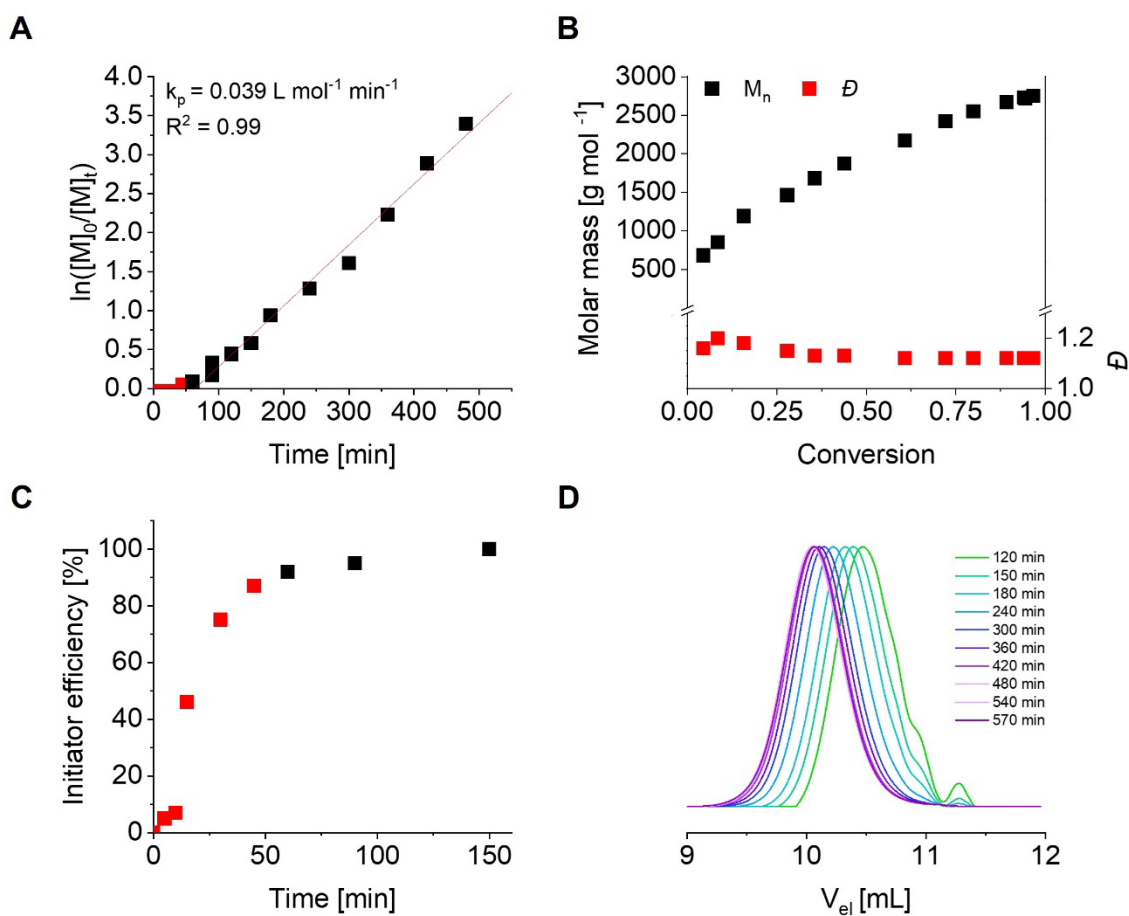

**Figure S16:** Kinetic investigation of the CROP of NonOx initiated by **3M** ( $[M]_0/[I]_0 = 10$ ,  $[M]_0 = 2 \text{ mol L}^{-1}$  in  $\text{CH}_3\text{CN}$ ,  $85 \text{ }^\circ\text{C}$ ). **A:** First-order kinetic plot according to  $\ln([M]_0/[M]_t) = k_p \times [I]_0 \times t$ . **B:** Evolution of the molar mass and dispersity with monomer conversion. Conversion was determined *via* GC. **C:** Initiator efficiency determined *via*  $^1\text{H}$  NMR spectroscopy. **D:** Overlay of SEC elugrams (RID, PS calibration).

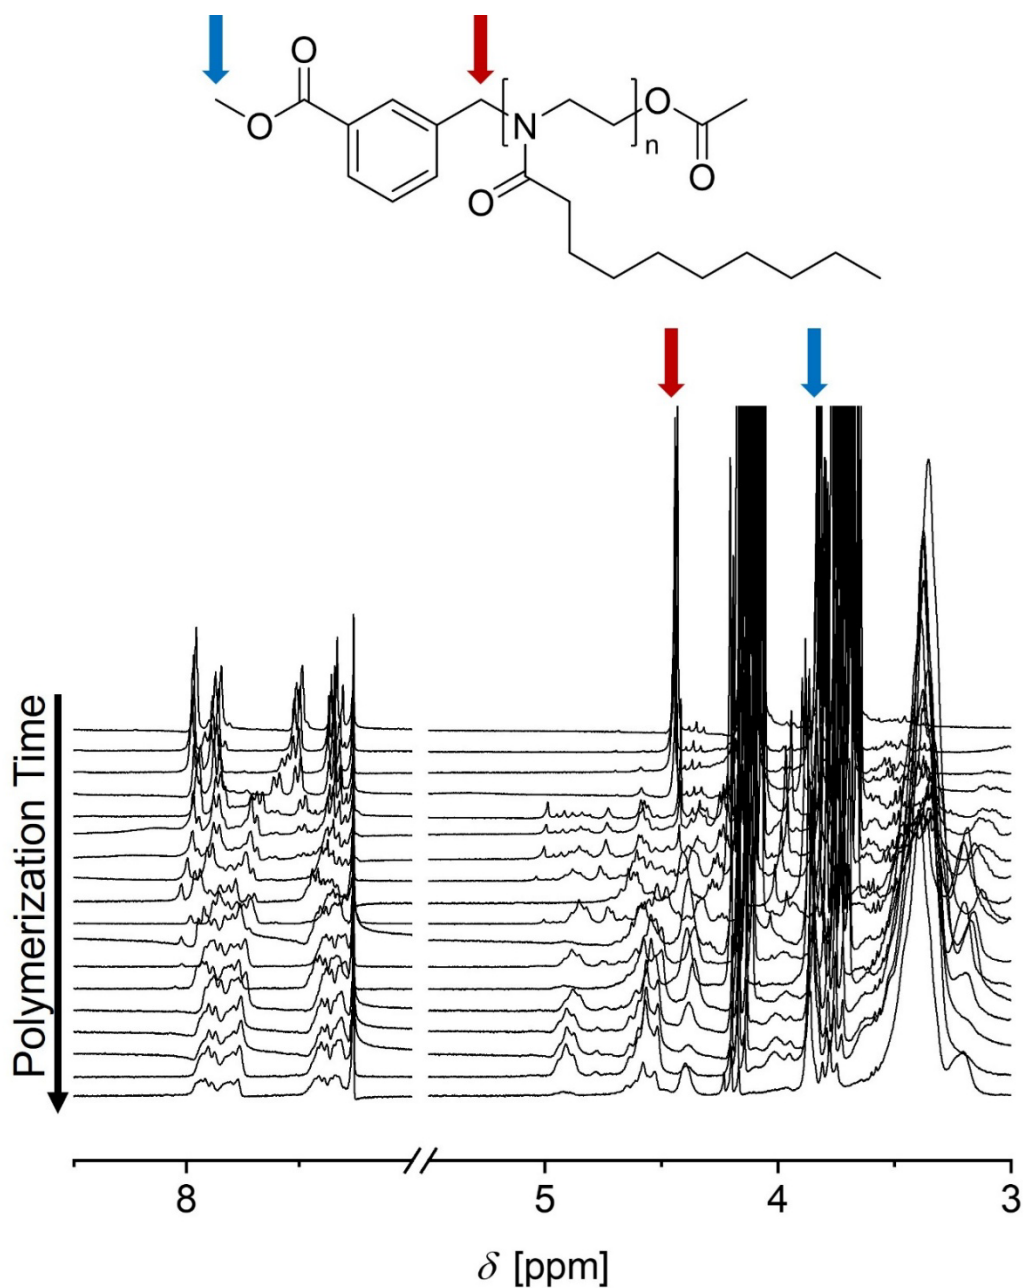

**Figure S17:** Overlay of <sup>1</sup>H NMR spectra (300 MHz, CDCl<sub>3</sub>) recorded during the kinetic studies of the CROP of NonOx initiated by **3M**. ( $[M]_0/[I]_0 = 10$ ,  $[M]_0 = 2 \text{ mol L}^{-1}$  in CH<sub>3</sub>CN, 85 °C). Arrows indicate the protons used to determine the initiation efficiency.

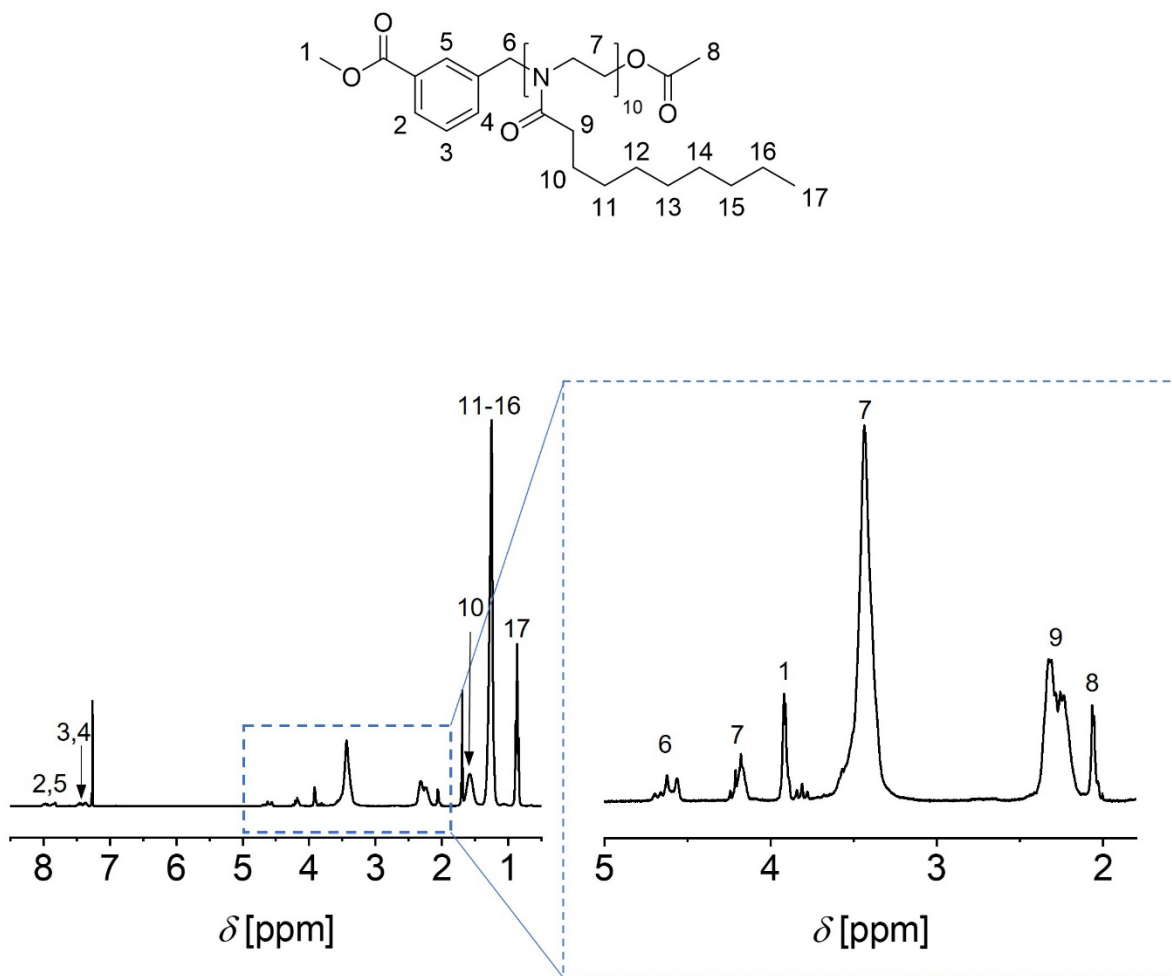

**Figure S18:** <sup>1</sup>H NMR spectrum (300 MHz, CDCl<sub>3</sub>) of 3M-NonOx<sub>10</sub>-OAc and assignments of the peaks to the schematic representation of the structure.

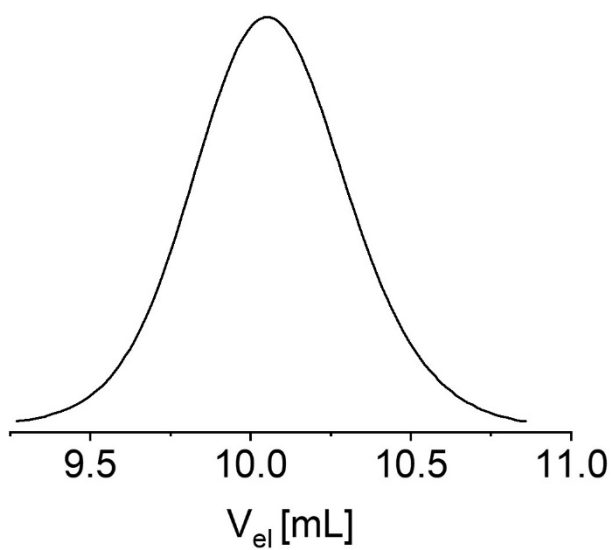

**Figure S19:** SEC elugram (RI detection) of 3M-NonOx<sub>10</sub>-OAc.

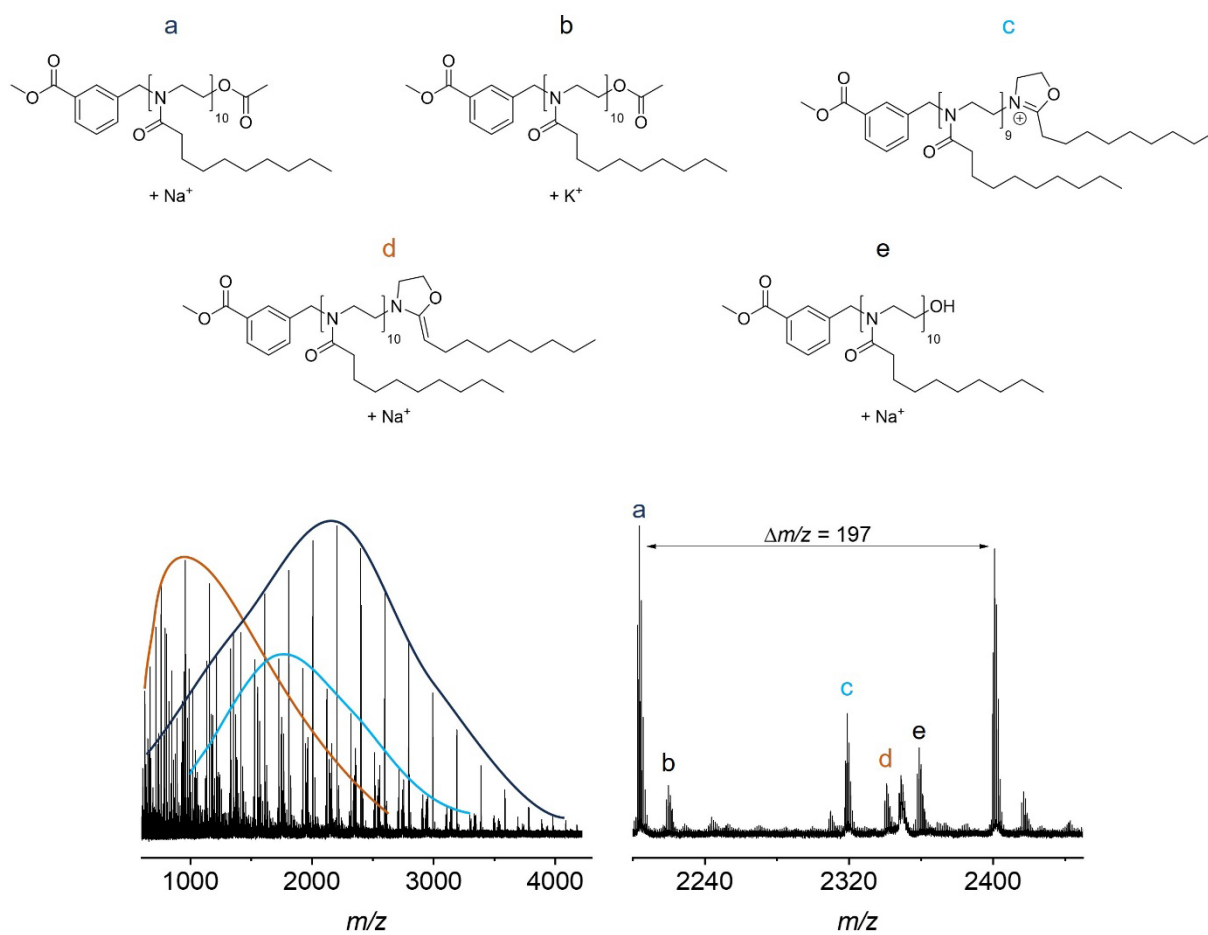

**Figure S20:** MALDI-TOF mass spectrum of **3M-NonOx<sub>10</sub>-OAc**. Left: Full spectrum. Right: Zoom into the most abundant  $m/z$  region to display the NonOx repeating unit of  $\Delta m/z = 197$  and peak assignment.

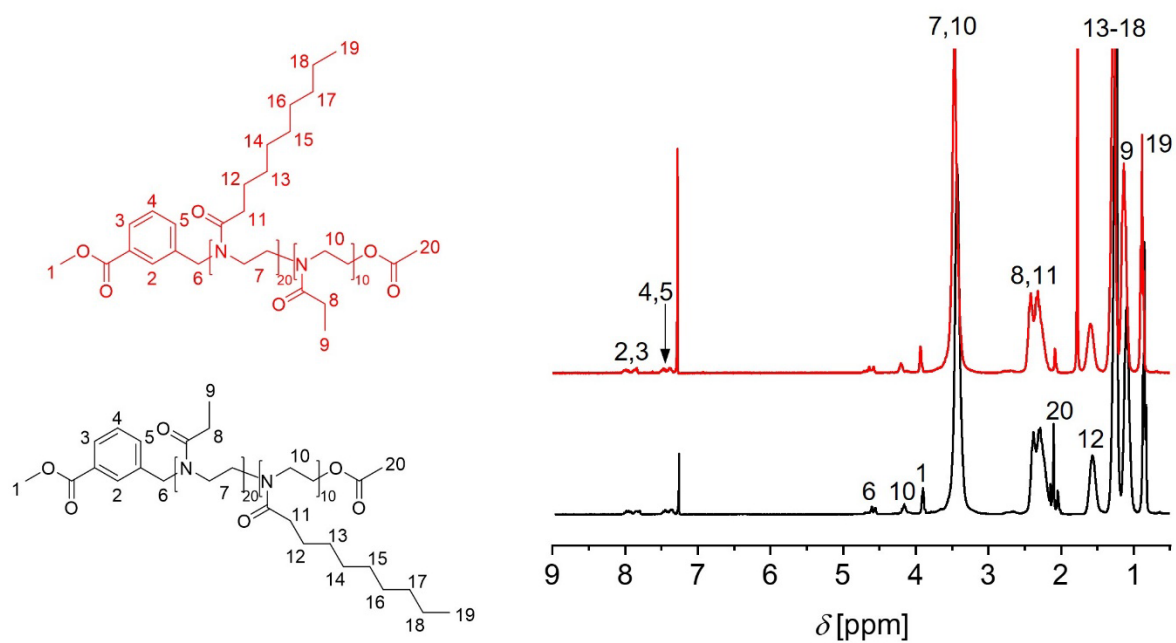

**Figure S21:** <sup>1</sup>H NMR spectra (300 MHz, CDCl<sub>3</sub>) of **3M-NonOx<sub>10</sub>-b-EtOx<sub>20</sub>-OAc** and **3M-EtOx<sub>20</sub>-b-EtOx<sub>20</sub>-OAc** and assignments of the peaks to the schematic representation of the structures. Signals 19 and 8, 11 were used to estimate the copolymer composition.

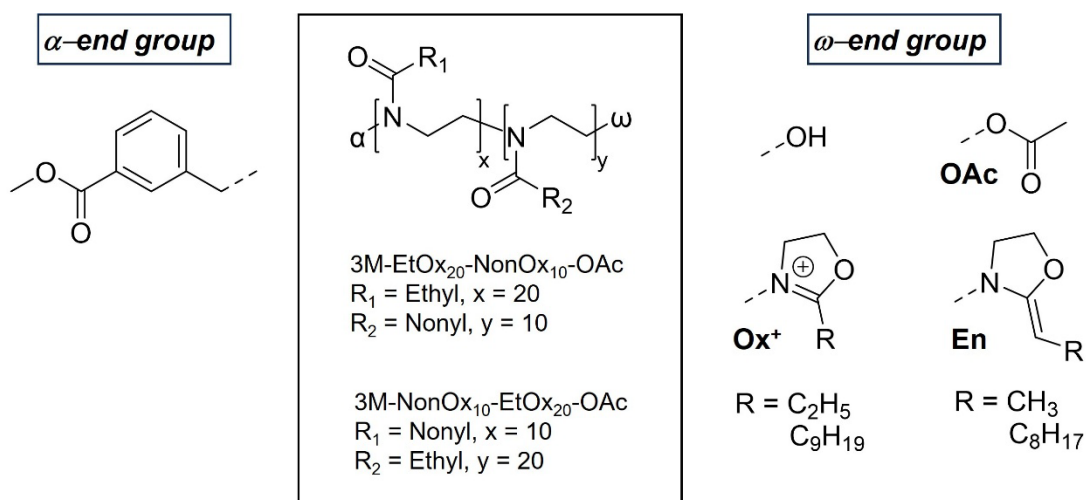

|   | <i>m/z</i>            | $\alpha$                                           | $\omega$                                                                               | Counter ion     |
|---|-----------------------|----------------------------------------------------|----------------------------------------------------------------------------------------|-----------------|
| a | 4184.21               | 3M<br>C <sub>9</sub> H <sub>9</sub> O <sub>2</sub> | OAc<br>C <sub>2</sub> H <sub>3</sub> O <sub>2</sub>                                    | Na <sup>+</sup> |
| b | 4200.18               | 3M<br>C <sub>9</sub> H <sub>9</sub> O <sub>2</sub> | OAc<br>C <sub>2</sub> H <sub>3</sub> O <sub>2</sub>                                    | K <sup>+</sup>  |
| c | 4102.21               | 3M<br>C <sub>9</sub> H <sub>9</sub> O <sub>2</sub> | Ox <sup>+</sup><br>C <sub>5</sub> H <sub>9</sub> NO/C <sub>12</sub> H <sub>23</sub> NO | -               |
| d | 4223.26 or<br>4321.37 | 3M<br>C <sub>9</sub> H <sub>9</sub> O <sub>2</sub> | En<br>C <sub>5</sub> H <sub>8</sub> NO/C <sub>12</sub> H <sub>22</sub> NO              | Na <sup>+</sup> |
| e | 4142.20               | 3M<br>C <sub>9</sub> H <sub>9</sub> O <sub>2</sub> | OH                                                                                     | Na <sup>+</sup> |

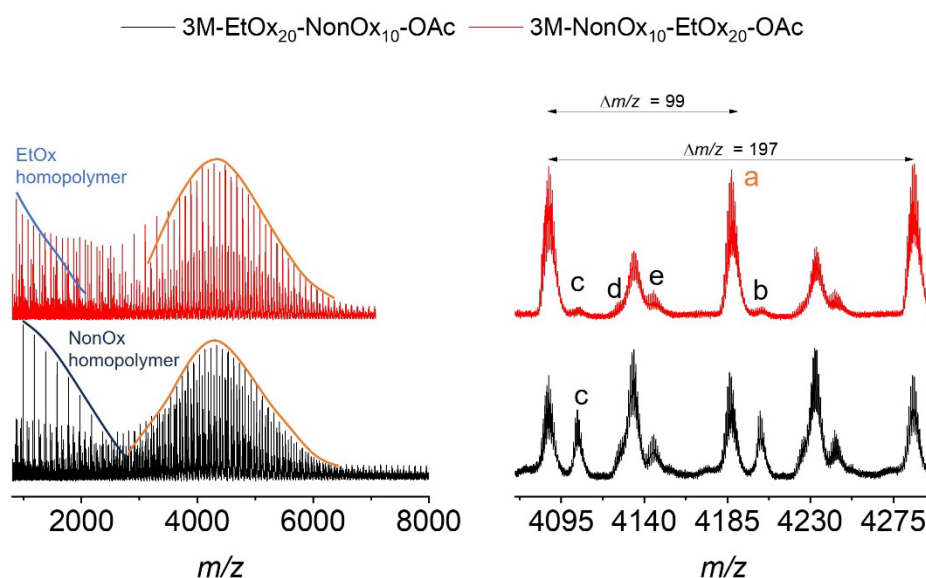

**Figure S22:** MALDI-TOF MS measurements of 3M-NonOx<sub>10</sub>-*b*-EtOx<sub>20</sub>-OAc and 3M-EtOx<sub>20</sub>-*b*-NonOx<sub>10</sub>-OAc (DCTB + NaTFA). Left: Full spectra. Right: Zoom into the most abundant *m/z* region and peak assignment.

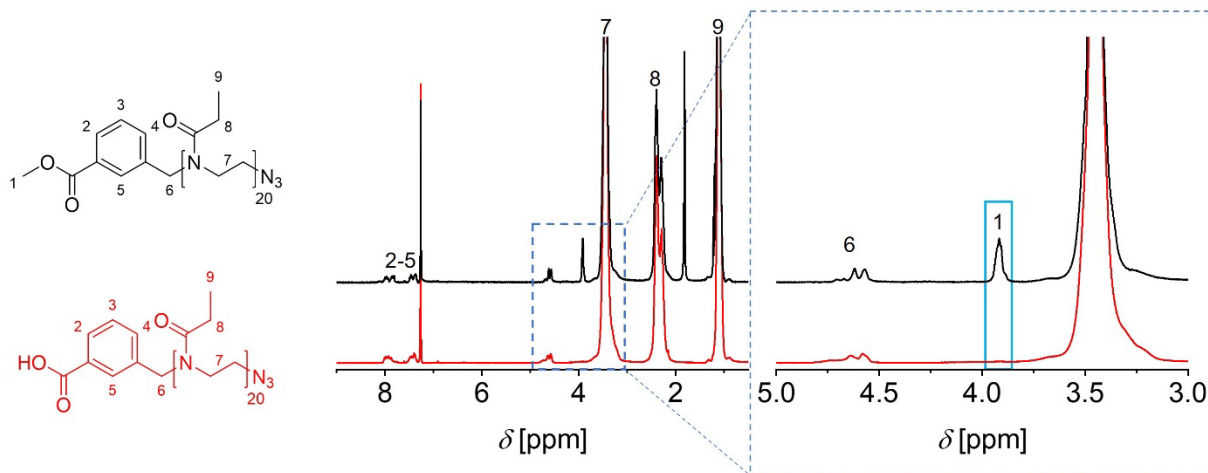

**Figure S23:**  $^1\text{H}$  NMR spectra (300 MHz,  $\text{CDCl}_3$ ) of **3M-EtOx<sub>20</sub>-N<sub>3</sub>** and **3A-EtOx<sub>20</sub>-N<sub>3</sub>** and assignments of the peaks to the schematic representation of the structures. Right: Zoom into the area, where the disappearance of the peak of the methyl ester group is visible (blue box).

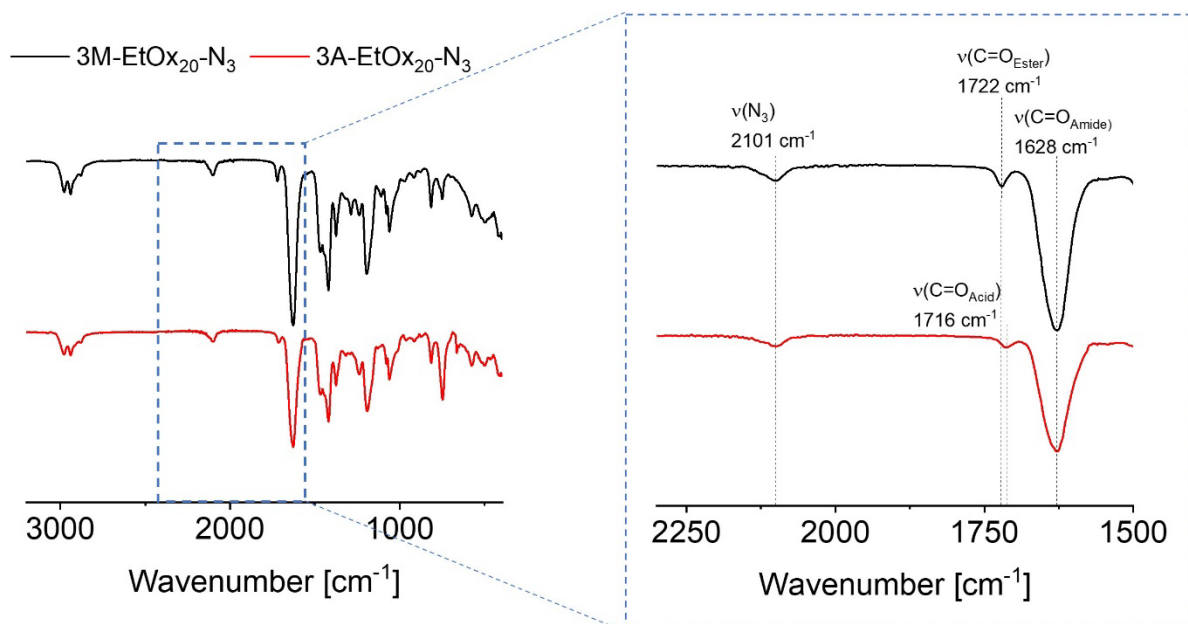

**Figure S24:** ATR-IR spectra of **3M-EtOx<sub>20</sub>-N<sub>3</sub>** and **3A-EtOx<sub>20</sub>-N<sub>3</sub>** and assignments of the characteristic vibrational bands.

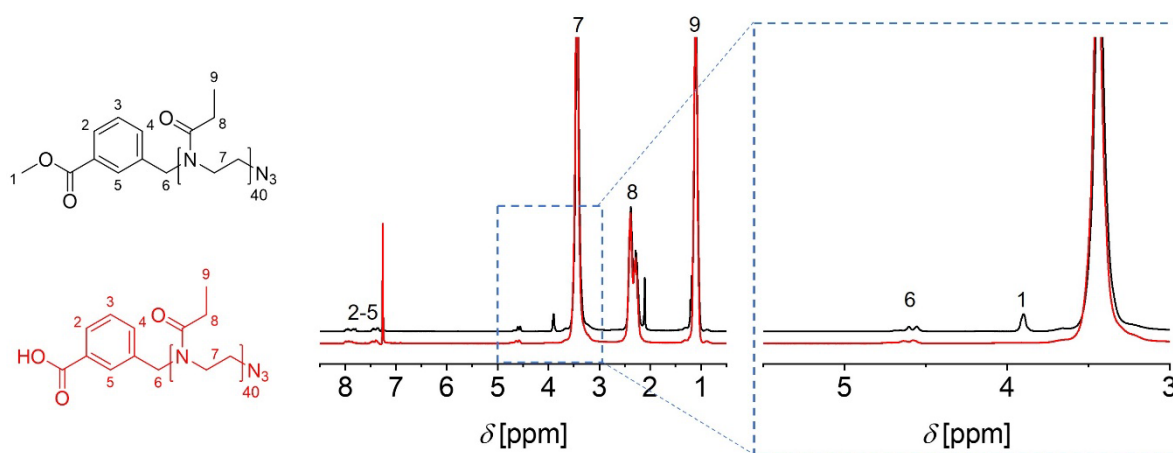

**Figure S25:**  $^1\text{H}$  NMR spectra (300 MHz,  $\text{CDCl}_3$ ) of **3M-EtOx<sub>40</sub>-N<sub>3</sub>** and **3A-EtOx<sub>40</sub>-N<sub>3</sub>** and assignments of the peaks to the schematic representation of the structures.

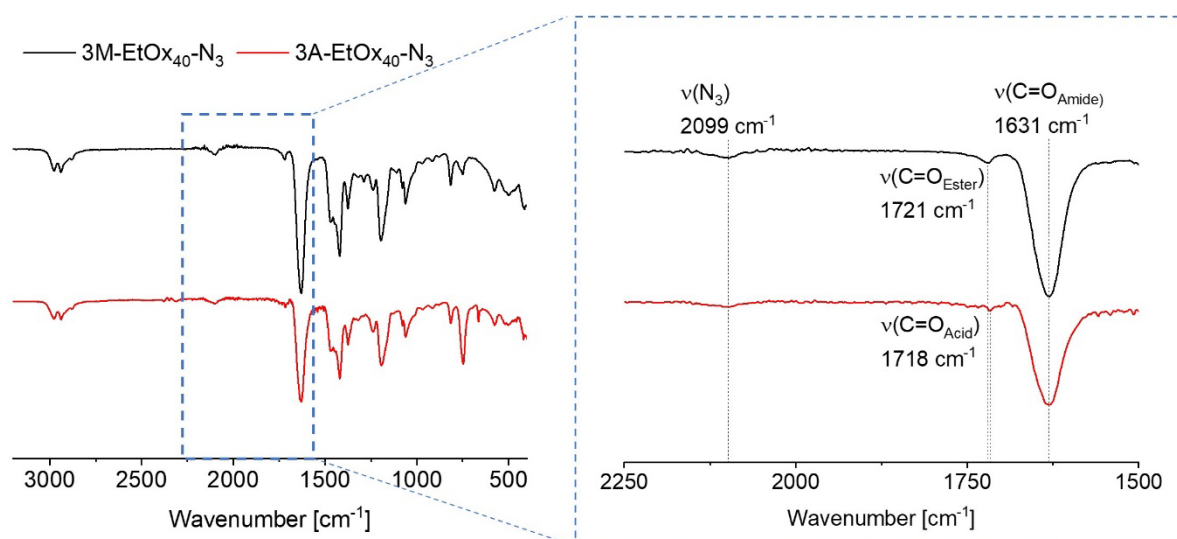

**Figure S26:** ATR-IR spectra of **3M-EtOx<sub>40</sub>-N<sub>3</sub>** and **3A-EtOx<sub>40</sub>-N<sub>3</sub>** and assignments of the characteristic vibrational bands.



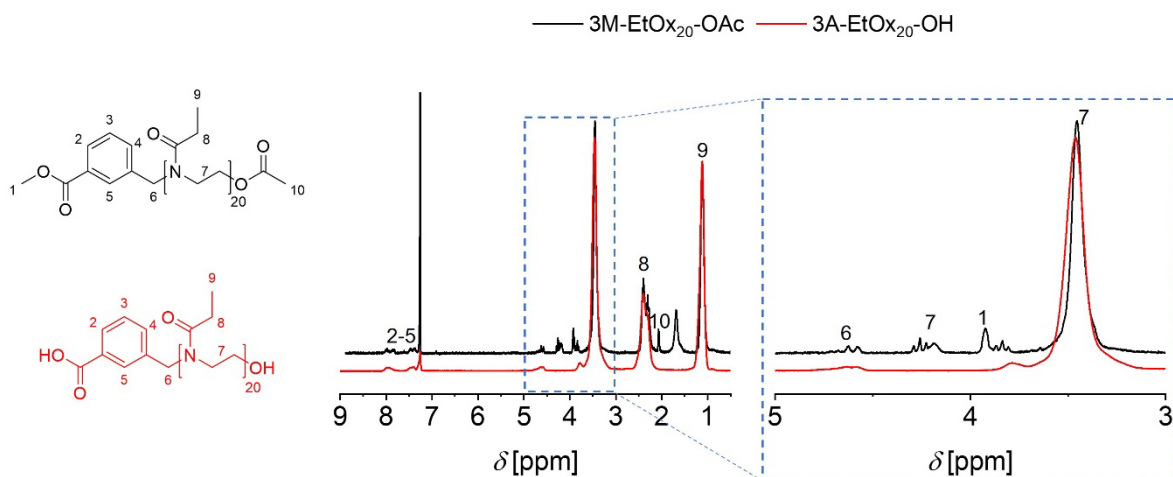

**Figure S29:** <sup>1</sup>H NMR spectra (300 MHz, CDCl<sub>3</sub>) of **3M-EtOx<sub>20</sub>-OAc** and **3A-EtOx<sub>20</sub>-OH** and assignments of the peaks to the schematic representation of the structures.

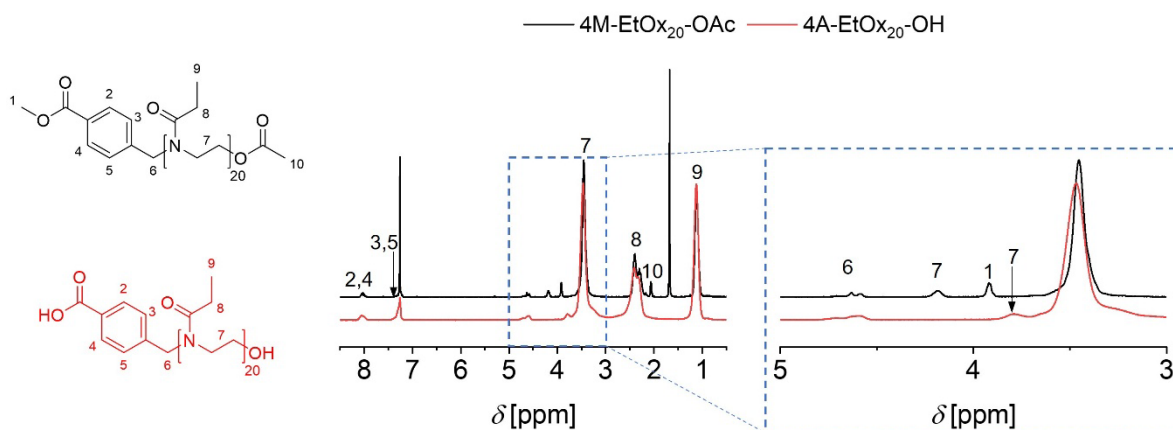

**Figure S30:** <sup>1</sup>H NMR spectra (300 MHz, CDCl<sub>3</sub>) of **4M-EtOx<sub>20</sub>-OAc** and **4A-EtOx<sub>20</sub>-OH** and assignments of the peaks to the schematic representation of the structures.

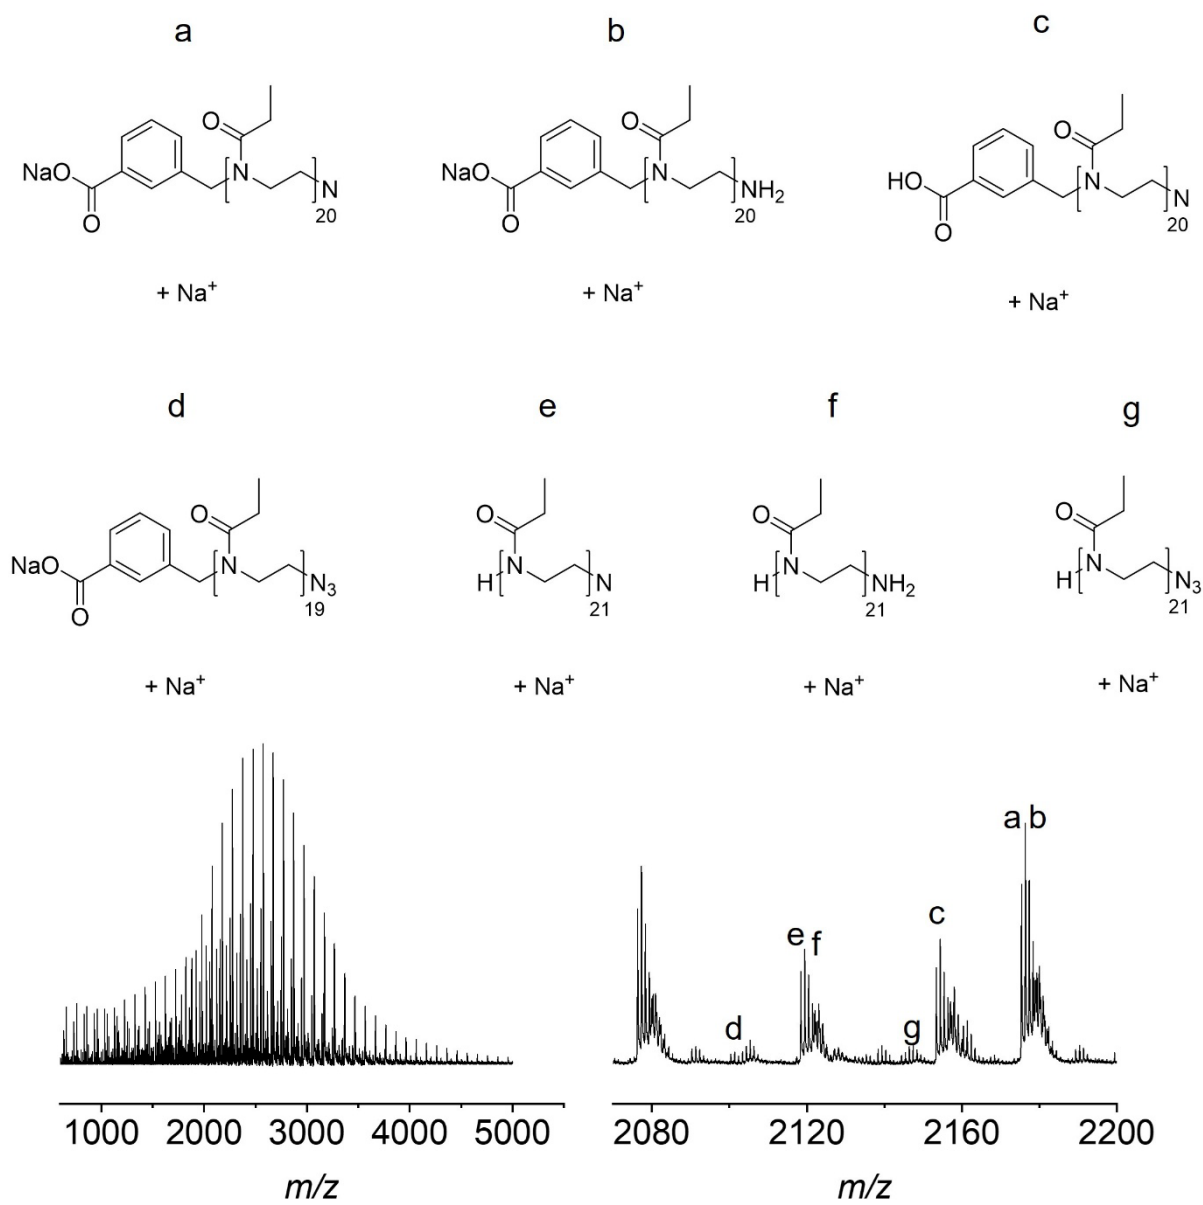

**Figure S31:** MALDI-TOF mass spectrum of **3A-EtOx<sub>20</sub>-N<sub>3</sub>**. Left: Full spectrum. Right: Assignment of detected *m/z* series.

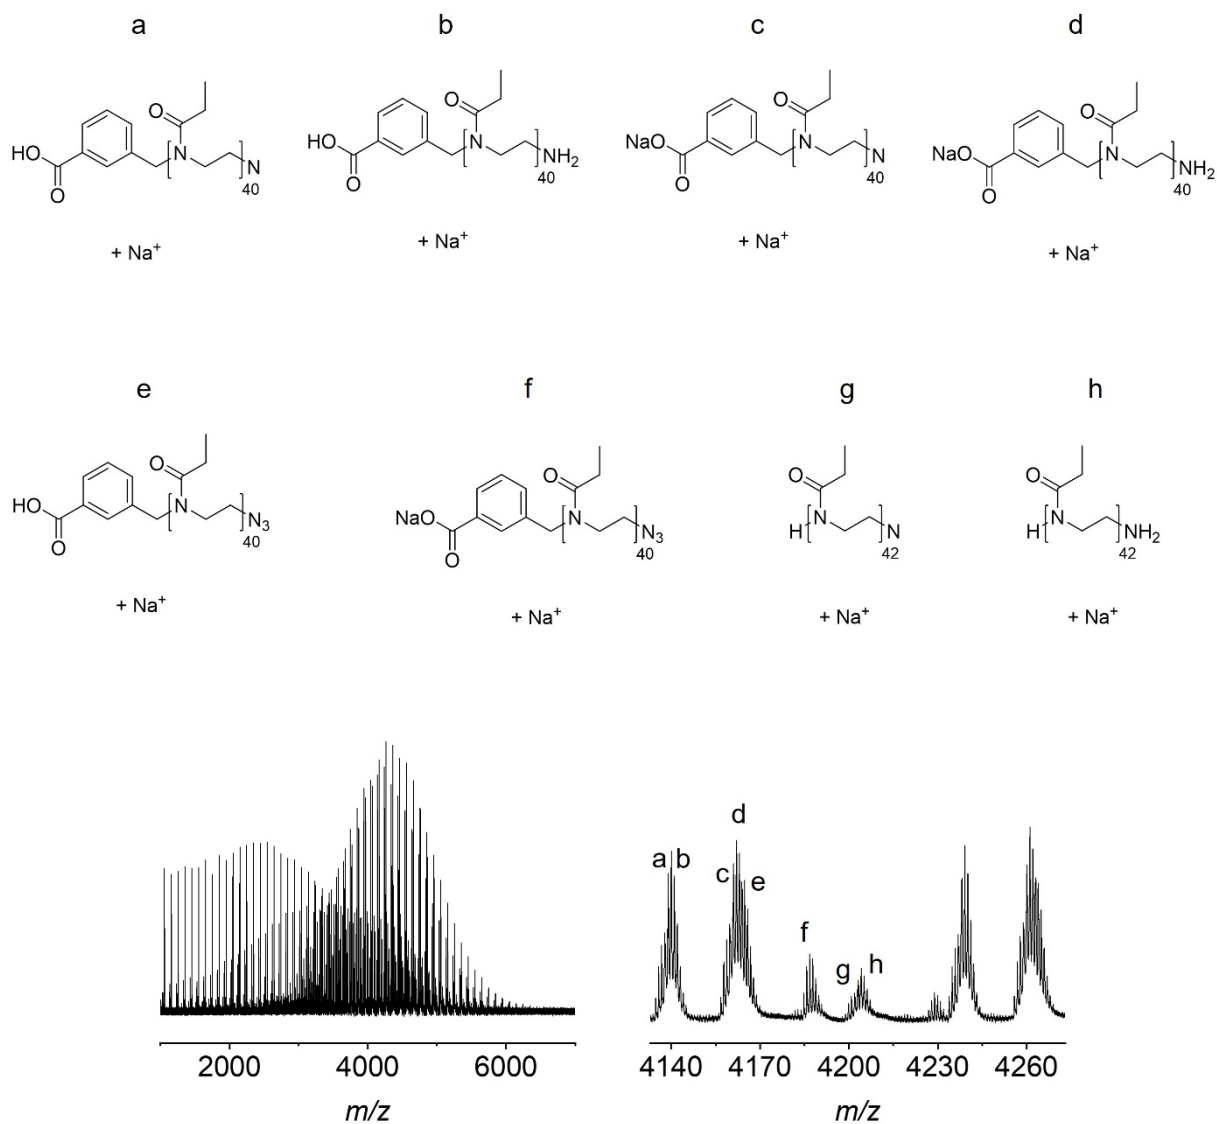

**Figure S32:** MALDI-TOF mass spectrum of **3A-EtOx<sub>40</sub>-N<sub>3</sub>**. Left: Full spectrum. Right: Assignment of detected  $m/z$  series.

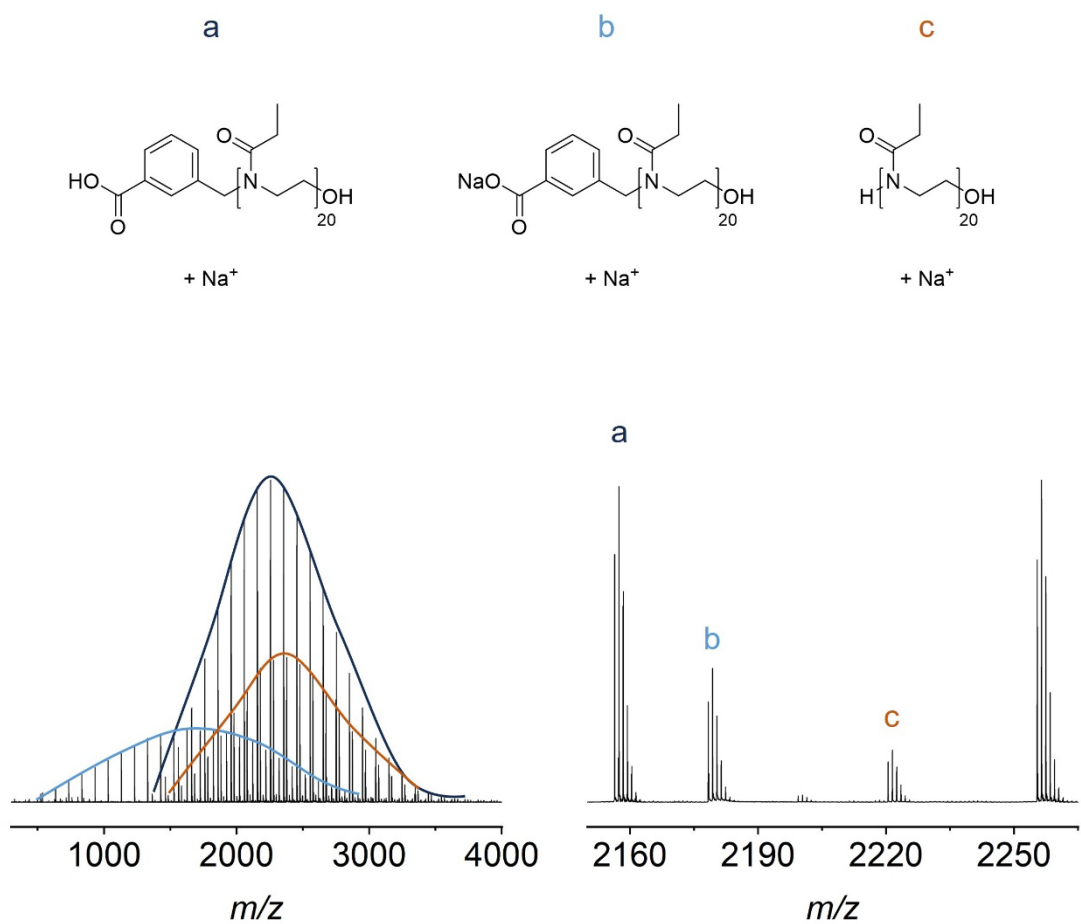

**Figure S33:** MALDI-TOF mass spectrum of **3A-EtOx<sub>20</sub>-OH**. Left: Full spectrum. Right: Assignment of the detected  $m/z$  series.

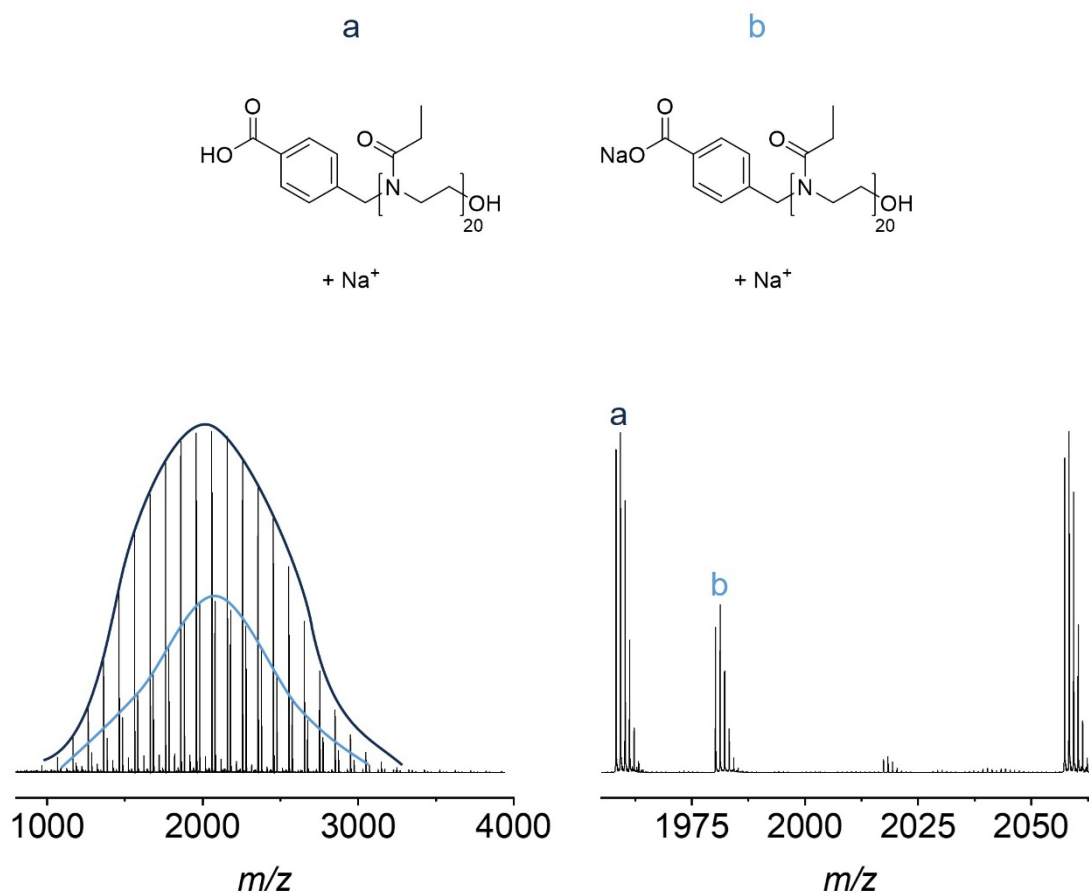

**Figure S34:** MALDI-TOF mass spectrum of 4A-EtOx<sub>20</sub>-OH. Left: Full spectrum. Right: Assignment of the detected  $m/z$  series.

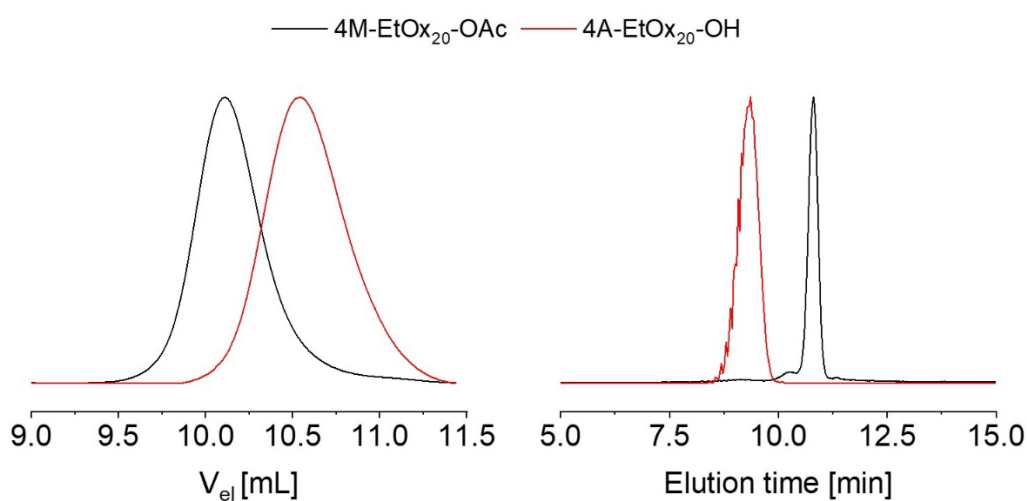

**Figure S35:** Chromatographic analysis of protected and deprotected PEtOx heterotelechelic obtained by initiation of CROP with 4M. Left: SEC (RID). Right: HPLC (RP18 Chromolith column, water/acetonitrile gradient with 0.1% formic acid, ELSD).
